# Supplementary material for: Regulatory Cross Talk Between SARS-CoV-2 Receptor Binding and Replication Machinery in the Human Host
Source: Front Physiol. 2020 Jun 30;11:802. doi: 10.3389/fphys.2020.00802 (PMC7338756; doi:10.3389/fphys.2020.00802)
Supplement: Supplementary file 2 [file Table_2.XLSX]

## Sheet: Sheet1
Supplementary Table S2. Hubs representing the proteins associated with metabolic diseases
Hubs from Receptor Mediated Network				Hubs derived from Viral Replication Machinery Network
Cardiovascular disease	Diabetes	Hypertension		Cardiovascular disease	Diabetes	Hypertension
ARF1	AP3S1	ARF6		ABL2	ACTB	ACTB
ARF6	AP3S2	ARRB1		ACTB	AKTIP	APC
ARRB1	ARF6	ARRB2		ANXA2	ANXA2	ARF6
ARRB2	ARRB1	ATP6V1B1		APC	AP3S2	ARRB1
ATIC	ARRB2	CD47		ARF1	APC	ATF2
BUB1B	ATIC	CD63		ARF6	ARF6	ATM
CD47	ATP6V1H	CLDND1		ARHGEF1	ARHGEF1	ATP6V1B1
CD63	CD47	FXYD1		ARHGEF12	ARHGEF11	BRAF
CLDND1	CD63	FYN		ARRB1	ARRB1	BRCA1
CSNK1A1	CLDND1	SLC2A1		ATF2	ATF2	CASP8
DDOST	DDOST	SUMO1		ATG12	ATIC	CAV1
FXYD1	FYN			ATIC	ATM	CD40
FYN	LANCL1			ATM	BAG6	CD63
LRRC8A	SLC2A1			BCAR1	BCAR1	CDH1
PUF60	SLC2A3			BCAR3	BRAF	CDK1
SLC2A1	SUMO1			BRAF	BRCA1	CDKN1A
SLC2A3				BRCA1	CASP10	CEBPB
SUMO1				BTRC	CASP7	CHM
SUMO3				CASP7	CASP8	CS
SVIL				CASP8	CAV1	CTNNB1
TUFM				CAV1	CD40	CUL1
				CD40	CD63	DNMT3A
				CD63	CDH1	FOS
				CDH1	CDK1	GNA12
				CDK1	CDKN1A	GOT2
				CDKN1A	CDKN1B	GRB2
				CDKN1B	CEBPB	HDAC1
				CEBPB	CHM	HDAC2
				CFLAR	COMMD1	HIF1A
				CHM	CREBBP	HMGB1
				CIR1	CREM	HSP90AB1
				COMMD1	CS	JAK1
				COPS2	CTNNB1	JUN
				COPS5	DDB2	KIF5B
				CREBBP	DDOST	LSM2
				CREM	DIS3	MAPK1
				CS	DNM2	MAPK8
				CSNK1A1	DNMT3A	MCC
				CSNK2A1	DNMT3B	MDM2
				CTNNB1	DVL1	MGMT
				CUL1	EFTUD2	MME
				CUL5	EP300	MPG
				DAB2	ERBB3	MSN
				DDB2	EXOSC4	MTHFD1
				DDOST	FOS	MYC
				DIS3	GNA13	NCOR2
				DMAP1	GRB2	NF2
				DNM2	H2AFX	NFKB1
				DNMT3A	HDAC1	NFKBIA
				DNMT3B	HDAC2	NOTCH1
				DVL1	HIF1A	NR3C1
				EP300	HIF1AN	PAG1
				ERBB3	HMGB1	PCNA
				FOS	HNRNPC	PFN1
				GOT2	HSPA1A	PIAS1
				GRB2	HSPA5	PIK3R1
				GTF2I	HSPA9	PML
				HDAC1	HSPD1	PRKCA
				HDAC2	IKBKE	PRKCI
				HIF1A	JAK1	PSMA6
				HIF1AN	KHSRP	PTEN
				HMGB1	KIF5B	RAF1
				HNRNPA1	KRT18	RB1
				HSP90AB1	MAP3K1	REL
				HSPA1A	MAP3K14	RELA
				HSPA5	MAP3K7	REST
				HSPA8	MAP3K8	RIPK1
				HSPD1	MAPK1	RUNX1
				IKBKE	MAPK14	RUVBL1
				IKBKG	MAPK8	SGK1
				JAK1	MARK4	SMAD2
				JUN	MCC	SMAD3
				KPNA2	MDM2	SMAD4
				LGALS3BP	MGMT	SMAD9
				MAP3K14	MME	SP1
				MAP3K3	MPG	STAT3
				MAP3K7	MSN	SUMO1
				MAP3K8	MTHFD1	TANK
				MAPK1	MYC	TBK1
				MAPK14	NCL	TBP
				MAPK8	NCOR2	TEC
				MARK4	NF2	TGFBR1
				MCC	NFKB1	THRB
				MDM2	NFKB2	TNFAIP3
				MGMT	NFKBIA	TOP2A
				MME	NOTCH1	TRADD
				MPG	NR3C1	TRAF3
				MSN	PCNA	TRAF6
				MTHFD1	PFKP	TSC1
				MYC	PHLPP2	TSC2
				NCL	PIK3R1	UBC
				NCOR2	PML	USP4
				NF2	PRKCA	XIAP
				NFKB1	PRKCI	YWHAB
				NFKB2	PSMA6	YWHAE
				NFKBIA	PTEN	YY1
				NOTCH1	RAF1	ZFP36
				NR3C1	RB1
				PCNA	RB1CC1
				PFKP	RBL2
				PFN1	REL
				PHLPP2	RELA
				PIAS1	REST
				PIAS4	RHOA
				PIK3R1	RIPK1
				PML	RUNX1
				POLA1	SF3B1
				PRKCA	SFPQ
				PRKCI	SGK1
				PSMA6	SHC1
				PTEN	SKIL
				PUF60	SLC2A3
				RAF1	SLX4
				RB1	SMAD2
				RBL2	SMAD3
				REL	SMAD4
				RELA	SMARCE1
				REST	SMC1A
				RHOA	SP1
				RIPK1	SPTBN1
				RPA1	STAT3
				RPA2	SUMO1
				RUNX1	TAB2
				SF3B1	TANK
				SGK1	TBK1
				SHC1	TBP
				SKIL	TEC
				SLC2A3	TGFBR1
				SLX4	TGM2
				SMAD2	THRB
				SMAD3	TNFAIP3
				SMAD4	TNIK
				SMAD9	TOP2A
				SMARCA4	TRADD
				SMARCB1	TRAF3
				SMARCC1	TRAF6
				SMC1A	TSC1
				SP1	TSC2
				STAT3	UBB
				SUMO1	UBC
				SUMO3	UBE2M
				SVIL	XIAP
				TAB2	XPO1
				TBCA	YWHAE
				TBK1	YWHAH
				TBP	YY1
				TEC	ZFP36
				TGFBR1
				TGM2
				THRB
				TMPO
				TNFAIP3
				TNFRSF10A
				TNIK
				TOP1
				TOP2A
				TRADD
				TRAF3
				TRAF5
				TRAF6
				TRIM28
				TSC1
				TSC2
				UBB
				UBC
				UBE2I
				UBE2M
				USP15
				USP4
				XIAP
				XPO1
				YWHAB
				YWHAE
				YWHAG
				YWHAZ
				YY1
				ZFP36
