# Supplementary material for: Regulatory Cross Talk Between SARS-CoV-2 Receptor Binding and Replication Machinery in the Human Host
Source: Front Physiol. 2020 Jun 30;11:802. doi: 10.3389/fphys.2020.00802 (PMC7338756; doi:10.3389/fphys.2020.00802)
Supplement: Supplementary file 3 [file Table_3.XLSX]

## Sheet: Sheet1
Supplementary Table S3. Hub proteins showing the association with the lung related diseases
				Hubs derived from Viral Replication Machinery Network
Proteins	Lung disease			Proteins	Lung disease
CLTC	COPD			ACTB	Asthma
TUFM	Asthma			APC	Asthma
CD47	Asthma			ARHGEF1	Asthma
CD63	COPD			ARHGEF12	Asthma
CD63	Asthma			BRCA1	Asthma
SVIL	COPD			CASP10	Asthma
FYN	Asthma			CASP8	Asthma
				CAV1	Asthma
				CD40	Asthma
				CDH1	Asthma
				CDKN1A	Asthma
				CDKN1B	Asthma
				CEBPB	Asthma
				CHM	Asthma
				CREM	Asthma
				CS	Asthma
				FOS	Asthma
				FYCO1	Asthma
				GRB2	Asthma
				GTF2I	Asthma
				HDAC1	Asthma
				HDAC2	Asthma
				HIF1A	Asthma
				HMGB1	Asthma
				HSPA1A	Asthma
				HSPA5	Asthma
				HSPA8	Asthma
				JAK1	Asthma
				JUN	Asthma
				KHSRP	Asthma
				LGALS3BP	Asthma
				MAP3K1	Asthma
				MAPK1	Asthma
				MCC	Asthma
				MDM2	Asthma
				MSN	Asthma
				MTHFD1	Asthma
				NCL	Asthma
				NFKB1	Asthma
				NFKB2	Asthma
				NFKBIA	Asthma
				NOTCH1	Asthma
				NR3C1	Asthma
				PCNA	Asthma
				PIAS1	Asthma
				PML	Asthma
				PRKCA	Asthma
				PSMA6	Asthma
				PTEN	Asthma
				RB1	Asthma
				REL	Asthma
				RELA	Asthma
				RIPK1	Asthma
				RUNX1	Asthma
				SGK1	Asthma
				SMAD2	Asthma
				SMAD3	Asthma
				SMAD4	Asthma
				SP1	Asthma
				SP3	Asthma
				STAT3	Asthma
				TANK	Asthma
				TBK1	Asthma
				TBP	Asthma
				TEC	Asthma
				TGFBR1	Asthma
				TGM2	Asthma
				TNFAIP3	Asthma
				TRADD	Asthma
				TRAF6	Asthma
				TSC1	Asthma
				TSC2	Asthma
				UBC	Asthma
				XIAP	Asthma
				XPO1	Asthma
				YY1	Asthma
				ZFP36	Asthma
				ATF2	Chronic Bronchitis
				CD40	Chronic bronchitis
				CHM	Chronic bronchitis
				CS	Chronic Bronchitis
				HDAC2	Chronic bronchitis
				HMGB1	Chronic bronchitis
				MAPK1	Chronic Bronchitis
				MCC	Chronic bronchitis
				PCNA	Chronic Bronchitis
				PTEN	Chronic Bronchitis
				SGK1	Chronic Bronchitis
				TEC	Chronic Bronchitis
				UBC	Chronic bronchitis
				XPO1	Chronic Bronchitis
				CD63	COPD
				CLTC	COPD
				SVIL	COPD
				APC	COPD
				ATF2	COPD
				ATM	COPD
				CAV1	COPD
				CD40	COPD
				CDH1	COPD
				CEBPB	COPD
				CFLAR	COPD
				CHM	COPD
				COMMD1	COPD
				CREM	COPD
				CS	COPD
				DNMT3A	COPD
				EP300	COPD
				GRB2	COPD
				HDAC1	COPD
				HDAC2	COPD
				HIF1A	COPD
				HMGB1	COPD
				HSPA1A	COPD
				JAK1	COPD
				KHSRP	COPD
				MAPK1	COPD
				MAPK14	COPD
				MAPK8	COPD
				MCC	COPD
				MDM2	COPD
				MGMT	COPD
				MME	COPD
				MPG	COPD
				MSN	COPD
				MTHFD1	COPD
				NCL	COPD
				NFKB1	COPD
				NR3C1	COPD
				PCNA	COPD
				PHLPP2	COPD
				PML	COPD
				PTEN	COPD
				RB1	COPD
				REL	COPD
				REST	COPD
				RUNX1	COPD
				SGK1	COPD
				SMAD2	COPD
				SMAD3	COPD
				SMAD4	COPD
				SP1	COPD
				SP3	COPD
				STAT3	COPD
				TBP	COPD
				TEC	COPD
				TGFBR1	COPD
				TGM2	COPD
				TNFRSF10A	COPD
				TRADD	COPD
				TRAF6	COPD
				UBC	COPD
				XIAP	COPD
				YY1	COPD
				APC	Emphysema
				ATM	Emphysema
				BRAF	Emphysema
				BRCA1	Emphysema
				CD40	Emphysema
				CEBPB	Emphysema
				COMMD1	Emphysema
				CS	Emphysema
				HDAC1	Emphysema
				HDAC2	Emphysema
				HMGB1	Emphysema
				MAPK14	Emphysema
				MAPK8	Emphysema
				MCC	Emphysema
				MDM2	Emphysema
				MME	Emphysema
				MSN	Emphysema
				PCNA	Emphysema
				PML	Emphysema
				PTEN	Emphysema
				RB1	Emphysema
				RUNX1	Emphysema
				SMAD2	Emphysema
				SMARCA2	Emphysema
				SMARCA4	Emphysema
				STAT3	Emphysema
				TBP	Emphysema
				UBC	Emphysema
				APC	Pneumonia
				ATM	Pneumonia
				CD40	Pneumonia
				CHM	Pneumonia
				HDAC2	Pneumonia
				HMGB1	Pneumonia
				MCC	Pneumonia
				PML	Pneumonia
				STAT3	Pneumonia
				TRAF6	Pneumonia
				UBC	Pneumonia
				CS	Pneumonia
				RANBP2	Pneumonia
