# Supplementary material for: Regulatory Cross Talk Between SARS-CoV-2 Receptor Binding and Replication Machinery in the Human Host
Source: Front Physiol. 2020 Jun 30;11:802. doi: 10.3389/fphys.2020.00802 (PMC7338756; doi:10.3389/fphys.2020.00802)
Supplement: Supplementary file 5 [file Table_5.XLSX]

## Sheet: Sheet1
Supplementary Table S5. Hub proteins relating the biological function and/or pathways
Molecular Function \Pathways of hubs from Receptor Mediated Network			Molceular function \Pathways of hubs derived from Viral Replication Machinery Network			Molceular function \Pathways of cascade connecting the hubs of Receptor Mediated Network and Viral Replication Machinery Network
Pathway name	Genes relevence		Pathway name	Genes relevence		Adaptive Immune System	ATP6V1A;TUBB;CUL2;HLA-B;VHL
Activated NOTCH1 Transmits Signal to the Nucleus	ARRB1;ARRB2		A tetrasaccharide linker sequence is required for GAG synthesis	GTF2F2		Antigen processing: Ubiquitination & Proteasome degradation	ATP6V1A;CUL2;VHL
Activated NTRK2 signals through FRS2 and FRS3	ATP6V1D		Abortive elongation of HIV-1 transcript in the absence of Tat	POLR2E;POLR2G;GTF2F2		Axon guidance	RPS9;TUBB;CUL2
Activated NTRK2 signals through FYN	FYN		Activated NOTCH1 Transmits Signal to the Nucleus	ARRB1		Cell Cycle	RB1;RAB2A;ATP6V1A;POLA1;POLA2;SUMO1;TUBB;PRIM1;H2AFX;ATM;SMC1A
Activated point mutants of FGFR2	AP3M2		Activated PKN1 stimulates transcription of AR (androgen receptor) regulated genes KLK2 and KLK3	H2AFX		Cell Cycle Checkpoints	SUMO1;H2AFX;ATM
Activation of APC/C and APC/C:Cdc20 mediated degradation of mitotic proteins	BUB1B;BUB1		Activation of AMPK downstream of NMDARs	TUBB		Cell Cycle, Mitotic	RB1;RAB2A;ATP6V1A;POLA1;POLA2;SUMO1;TUBB;PRIM1;H2AFX;SMC1A
Activation of G protein gated Potassium channels	ATIC		Activation of anterior HOX genes in hindbrain development during early embryogenesis	H2AFX;POLR2E;POLR2G		Cellular response to hypoxia	CUL2;VHL
Activation of GABAB receptors	ATIC		Activation of HOX genes during differentiation	H2AFX;POLR2E;POLR2G		Cellular responses to external stimuli	RB1;ATP6V1A;RPS9;TUBB;CUL2;H2AFX;ATM;VHL;NR3C1
Activation of IRF3/IRF7 mediated by TBK1/IKK epsilon	ATP6V1D		Activation of NMDA receptors and postsynaptic events	TUBB		Cellular responses to stress	RB1;ATP6V1A;RPS9;TUBB;CUL2;H2AFX;ATM;VHL;NR3C1
Activation of RAC1	CLDND1		Activation of SMO	ARRB1		Class I MHC mediated antigen processing & presentation	ATP6V1A;CUL2;HLA-B;VHL
Activation of SMO	CSNK1A1;ARRB1;ARRB2		Activation of the mRNA upon binding of the cap-binding complex and eIFs, and subsequent binding to 43S	RPS9		Cytokine Signaling in Immune system	SMARCC1;SUMO1;HLA-B;ARRB1
Activation of the mRNA upon binding of the cap-binding complex and eIFs, and subsequent binding to 43S	EIF4A2		Activation of the pre-replicative complex	POLA1;POLA2;PRIM1		Deubiquitination	RPS9;H2AFX;ARRB1
Adaptive Immune System	ATP6V1A;ARF1;AP1G1;CUL2;CLTC;HLA-B;FYN;ATP6V1D;AP1M1		Adaptive Immune System	ATP6V1A;TUBB;CUL2;HLA-B;VHL		Developmental Biology	RPS9;TUBB;CUL2;H2AFX;POLR2E;POLR2G
Advanced glycosylation endproduct receptor signaling	DDOST		Aggrephagy	TUBB		DNA Double Strand Break Response	SUMO1;H2AFX;ATM
AMER1 mutants destabilize the destruction complex	CSNK1A1		Amino acids regulate mTORC1	ATP6V1A		DNA Double-Strand Break Repair	SUMO1;H2AFX;ATM
Amino acids regulate mTORC1	ATP6V1A;ATP6V1B2;ATP6V1H;ATP6V1E1;ATP6V0D1;ATP6V1D;ATP6V1C1;ATP6V1F;ATP6V1B1		Amyloid fiber formation	H2AFX		DNA Repair	RPS9;SUMO1;H2AFX;POLR2E;POLR2G;ATM
AMPK inhibits chREBP transcriptional activation activity	EIF4A2		Anchoring of the basal body to the plasma membrane	TUBB		G2/M Checkpoints	SUMO1;H2AFX;ATM
Amplification of signal from unattached kinetochores via a MAD2 inhibitory signal	BUB1B;BUB1		Antigen Presentation: Folding, assembly and peptide loading of class I MHC	HLA-B		G2/M DNA damage checkpoint	SUMO1;H2AFX;ATM
Amplification of signal from the kinetochores	BUB1B;BUB1		Antigen processing: Ubiquitination & Proteasome degradation	ATP6V1A;CUL2;VHL		Gene expression (Transcription)	RB1;SMARCC1;SUMO1;H2AFX;POLR2E;DDX21;CHM;POLR2G;ATM;NR3C1;GTF2F2
Amyloid fiber formation	TSPAN14		Antigen processing-Cross presentation	HLA-B		Generic Transcription Pathway	RB1;SMARCC1;SUMO1;H2AFX;POLR2E;CHM;POLR2G;ATM;NR3C1;GTF2F2
Antigen activates B Cell Receptor (BCR) leading to generation of second messengers	FYN		Arachidonic acid metabolism	POLA2		Global Genome Nucleotide Excision Repair (GG-NER)	RPS9;SUMO1
Antigen Presentation: Folding, assembly and peptide loading of class I MHC	HLA-B		Asparagine N-linked glycosylation	TUBB		HDR through Homologous Recombination (HRR) or Single Strand Annealing (SSA)	SUMO1;H2AFX;ATM
Antigen processing: Ubiquitination & Proteasome degradation	ATP6V1A;AP1G1;CUL2		Assembly and cell surface presentation of NMDA receptors	TUBB		Hemostasis	TUBB;ARRB1
Antigen processing-Cross presentation	HLA-B		AURKA Activation by TPX2	TUBB		Homology Directed Repair	SUMO1;H2AFX;ATM
Anti-inflammatory response favouring Leishmania parasite infection	FYN		Autodegradation of the E3 ubiquitin ligase COP1	ATM		Immune System	ATP6V1A;SMARCC1;SUMO1;DHX9;TUBB;CUL2;HLA-B;POLR2E;STOM;ARRB1;VHL
Antiviral mechanism by IFN-stimulated genes	EIF4A2;FLOT2		Autophagy	TUBB;ATM		Innate Immune System	ATP6V1A;DHX9;TUBB;HLA-B;POLR2E;STOM
APC truncation mutants have impaired AXIN binding	CSNK1A1		Axon guidance	RPS9;TUBB;CUL2		Interferon gamma signaling	SUMO1;HLA-B
APC/C:Cdc20 mediated degradation of mitotic proteins	BUB1B;BUB1		Base Excision Repair	H2AFX		Interferon Signaling	SUMO1;HLA-B
APC/C-mediated degradation of cell cycle proteins	BUB1B;BUB1		Base-Excision Repair, AP Site Formation	H2AFX		Intra-Golgi and retrograde Golgi-to-ER traffic	TUBB;CUL2
APC:Cdc20 mediated degradation of cell cycle proteins prior to satisfation of the cell cycle checkpoint	BUB1B;BUB1		Biological oxidations	POLA2		M Phase	RB1;RAB2A;SUMO1;TUBB;H2AFX;SMC1A
APC-Cdc20 mediated degradation of Nek2A	BUB1B;BUB1		B-WICH complex positively regulates rRNA expression	H2AFX;POLR2E;DDX21		Membrane Trafficking	TUBB;CUL2;CHM;AP3B1;ARRB1;ARF6
Asparagine N-linked glycosylation	ARF1;AP3D1;DDOST		Cap-dependent Translation Initiation	RPS9		Metabolism	RAB2A;RPS9;POLA2;H2AFX;ARRB1;GTF2F2
AXIN missense mutants destabilize the destruction complex	CSNK1A1		Carboxyterminal post-translational modifications of tubulin	TUBB		Metabolism of lipids	RAB2A;POLA2;H2AFX;ARRB1
AXIN mutants destabilize the destruction complex, activating WNT signaling	CSNK1A1		Cargo recognition for clathrin-mediated endocytosis	ARRB1		Metabolism of proteins	RAB2A;ATP6V1A;RPS9;TUBB;CUL2;H2AFX;HLA-B;CHM;ARRB1;TBCA;NR3C1;SMC1A;SUMO1;SP3;VHL;TOP1
Axon guidance	CLDND1;CUL2;CLTC;FYN;ATP6V1D		Cell Cycle	RB1;RAB2A;ATP6V1A;POLA1;POLA2;SUMO1;TUBB;PRIM1;H2AFX;ATM;SMC1A		Metabolism of RNA	SF3A1;RPS9;PUF60;DHX9;NCL;POLR2E;DDX21;POLR2G;GTF2F2
BBSome-mediated cargo-targeting to cilium	CSNK1A1		Cell Cycle Checkpoints	SUMO1;H2AFX;ATM		Mitotic Anaphase	SUMO1;TUBB;SMC1A
Beta-catenin independent WNT signaling	CLTC;ARRB2		Cell Cycle, Mitotic	RB1;RAB2A;ATP6V1A;POLA1;POLA2;SUMO1;TUBB;PRIM1;H2AFX;SMC1A		Mitotic Metaphase and Anaphase	SUMO1;TUBB;SMC1A
Beta-catenin phosphorylation cascade	CSNK1A1		Cellular hexose transport	GTF2F2		mRNA Splicing	SF3A1;PUF60;DHX9;POLR2E;POLR2G;GTF2F2
Blockage of phagosome acidification	ATP6V1H		Cellular response to heat stress	ATM		mRNA Splicing - Major Pathway	SF3A1;PUF60;DHX9;POLR2E;POLR2G;GTF2F2
B-WICH complex positively regulates rRNA expression	RAB14		Cellular response to hypoxia	CUL2;VHL		Muscle contraction	PUF60;DDX21
Cap-dependent Translation Initiation	EIF4A2		Cellular responses to external stimuli	RB1;ATP6V1A;RPS9;TUBB;CUL2;H2AFX;ATM;VHL;NR3C1		Neddylation	ATP6V1A;CUL2;VHL
Cardiac conduction	FXYD1		Cellular responses to stress	RB1;ATP6V1A;RPS9;TUBB;CUL2;H2AFX;ATM;VHL;NR3C1		Neutrophil degranulation	TUBB;HLA-B;STOM
Cargo concentration in the ER	AP3D1		Cellular Senescence	RB1;H2AFX;ATM		Nonhomologous End-Joining (NHEJ)	SUMO1;H2AFX;ATM
Cargo recognition for clathrin-mediated endocytosis	CLTC;ARRB1;ARRB2		Centrosome maturation	TUBB		Nuclear Envelope (NE) Reassembly	SUMO1;TUBB
Cargo trafficking to the periciliary membrane	CSNK1A1		Chaperonin-mediated protein folding	TUBB		Nucleotide Excision Repair	RPS9;SUMO1;POLR2E;POLR2G
CD209 (DC-SIGN) signaling	FYN		Chondroitin sulfate/dermatan sulfate metabolism	GTF2F2		Oxygen-dependent proline hydroxylation of Hypoxia-inducible Factor Alpha	CUL2;VHL
CD28 co-stimulation	FYN		Chromatin modifying enzymes	SMARCC1;H2AFX		Post-translational protein modification	RAB2A;ATP6V1A;RPS9;TUBB;CUL2;H2AFX;HLA-B;CHM;ARRB1;NR3C1;SMC1A;SUMO1;SP3;VHL;TOP1
CD28 dependent PI3K/Akt signaling	FYN		Chromatin organization	SMARCC1;H2AFX		Processing and activation of SUMO	SUMO1
CD28 dependent Vav1 pathway	FYN		Chromosome Maintenance	POLA1;POLA2;PRIM1;H2AFX		Processing of Capped Intron-Containing Pre-mRNA	SF3A1;PUF60;DHX9;POLR2E;POLR2G;GTF2F2
Cdc20:Phospho-APC/C mediated degradation of Cyclin A	BUB1B;BUB1		Cilium Assembly	TUBB		Processing of DNA double-strand break ends	SUMO1;H2AFX;ATM
Cell Cycle	ATP6V1A;PIF1;SUMO1;FLOT2;BUB1B;BUB1		Circadian Clock	NR3C1		RAB geranylgeranylation	RAB2A;CUL2;CHM
Cell Cycle Checkpoints	SUMO1;BUB1B;BUB1		Class I MHC mediated antigen processing & presentation	ATP6V1A;CUL2;HLA-B;VHL		Rab regulation of trafficking	CHM;ARF6
Cell Cycle, Mitotic	ATP6V1A;SUMO1;FLOT2;BUB1B;BUB1		Clathrin-mediated endocytosis	ARRB1;ARF6		Recruitment and ATM-mediated phosphorylation of repair and signaling proteins at DNA double strand breaks	SUMO1;H2AFX;ATM
Cell death signalling via NRAGE, NRIF and NADE	CD63;CLDND1		Cleavage of the damaged purine	H2AFX		Regulation of expression of SLITs and ROBOs	RPS9;CUL2
Cell junction organization	CD63		Cleavage of the damaged pyrimidine	H2AFX		RNA Polymerase II Transcription	RB1;SMARCC1;SUMO1;H2AFX;POLR2E;CHM;POLR2G;ATM;NR3C1;GTF2F2
Cell surface interactions at the vascular wall	FYN;CD47;ATP6V1D		Cohesin Loading onto Chromatin	SMC1A		Signal Transduction	ATP6V1A;SMARCC1;TUBB;H2AFX;POLR2E;POLR2G;ARRB1;NR3C1;SMC1A;GTF2F2;ARF6
Cell-Cell communication	CD63;FYN;CD47;ATP6V1D		Collagen biosynthesis and modifying enzymes	RB1		Signaling by Hedgehog	TUBB;ARRB1
Cell-extracellular matrix interactions	CD63		Collagen chain trimerization	RB1		Signaling by NOTCH	H2AFX;ARRB1
Cellular hexose transport	SLC2A1;SLC2A3		Collagen degradation	RB1		Signaling by Receptor Tyrosine Kinases	ATP6V1A;POLR2E;POLR2G;GTF2F2;ARF6
Cellular response to heat stress	FLOT2		Collagen formation	RB1		Signaling by ROBO receptors	RPS9;CUL2
Cellular response to hypoxia	CUL2		Condensation of Prophase Chromosomes	RB1;H2AFX		SUMO E3 ligases SUMOylate target proteins	SUMO1;SP3;VHL;TOP1;NR3C1;SMC1A
Cellular responses to external stimuli	ATP6V1A;CUL2;ATP6V1B2;FLOT2;ATP6V1H;ATP6V1E1;ATP6V0D1;ATP6V1D;ATP6V1C1;ATP6V1F;ATP6V1B1		Cooperation of Prefoldin and TriC/CCT in actin and tubulin folding	TUBB		SUMOylation	SUMO1;SP3;VHL;TOP1;NR3C1;SMC1A
Cellular responses to stress	ATP6V1A;CUL2;ATP6V1B2;FLOT2;ATP6V1H;ATP6V1E1;ATP6V0D1;ATP6V1D;ATP6V1C1;ATP6V1F;ATP6V1B1		COPI-dependent Golgi-to-ER retrograde traffic	TUBB		SUMOylation of DNA damage response and repair proteins	SUMO1;SMC1A
Chromosome Maintenance	PIF1		COPI-independent Golgi-to-ER retrograde traffic	TUBB		SUMOylation of DNA replication proteins	SUMO1;TOP1
Cilium Assembly	CSNK1A1		COPI-mediated anterograde transport	TUBB		SUMOylation of intracellular receptors	SUMO1;NR3C1
Class A/1 (Rhodopsin-like receptors)	ARRB2		Cyclin A:Cdk2-associated events at S phase entry	RB1		SUMOylation of transcription factors	SUMO1;SP3
Class I MHC mediated antigen processing & presentation	ATP6V1A;AP1G1;CUL2;HLA-B		Cyclin D associated events in G1	RB1		SUMOylation of ubiquitinylation proteins	SUMO1;VHL
Clathrin-mediated endocytosis	CLTC;ARRB1;ARRB2;ARF6		Cyclin E associated events during G1/S transition	RB1		Ub-specific processing proteases	H2AFX;ARRB1
Collagen biosynthesis and modifying enzymes	SLC2A1		Cytochrome P450 - arranged by substrate type	POLA2		Vesicle-mediated transport	TUBB;CUL2;CHM;AP3B1;ARRB1;ARF6
Collagen formation	SLC2A1		Cytokine Signaling in Immune system	SMARCC1;SUMO1;HLA-B;ARRB1
Common Pathway of Fibrin Clot Formation	AP3D1		Cytosolic sensors of pathogen-associated DNA	DHX9;POLR2E
Constitutive Signaling by Aberrant PI3K in Cancer	AP3M2;FYN		DAP12 interactions	HLA-B
COPI-dependent Golgi-to-ER retrograde traffic	ARF1		Defective CYP2U1 causes Spastic paraplegia 56, autosomal recessive (SPG56)	POLA2
COPII-mediated vesicle transport	AP3D1		Defective SLC26A4 causes Pendred syndrome (PDS)	SMC1A
COPI-mediated anterograde transport	ARF1		Degradation of the extracellular matrix	RB1
Costimulation by the CD28 family	FYN;ATP6V1D		Deposition of new CENPA-containing nucleosomes at the centromere	H2AFX
CRMPs in Sema3A signaling	FYN		Depurination	H2AFX
CTLA4 inhibitory signaling	FYN;ATP6V1D		Depyrimidination	H2AFX
C-type lectin receptors (CLRs)	FYN		Deubiquitination	RPS9;H2AFX;ARRB1
Cytokine Signaling in Immune system	EIF4A2;AP3M2;ARF1;CLDND1;SUMO1;HLA-B;FLOT2;FYN;ARRB1;ARRB2;ATP6V1D		Developmental Biology	RPS9;TUBB;CUL2;H2AFX;POLR2E;POLR2G
DAP12 interactions	HLA-B;FYN		DEx/H-box helicases activate type I IFN and inflammatory cytokines production	DHX9
DAP12 signaling	FYN		Disease	RPS9;POLA2;TUBB;POLR2E;AP3B1;POLR2G;ARRB1;SMC1A;GTF2F2
DCC mediated attractive signaling	FYN		Diseases of metabolism	POLA2
Deadenylation of mRNA	EIF4A2		Diseases of signal transduction by growth factor receptors and second messengers	POLR2E;AP3B1;POLR2G;ARRB1;GTF2F2
Deadenylation-dependent mRNA decay	EIF4A2		Disorders of transmembrane transporters	SMC1A
Death Receptor Signalling	CD63;CLDND1		DNA Damage Recognition in GG-NER	RPS9
Dectin-2 family	FYN		DNA Damage/Telomere Stress Induced Senescence	RB1;H2AFX;ATM
Defective SLC2A1 causes GLUT1 deficiency syndrome 1 (GLUT1DS1)	SLC2A1		DNA Double Strand Break Response	SUMO1;H2AFX;ATM
Defective TPR may confer susceptibility towards thyroid papillary carcinoma (TPC)	FLOT2		DNA Double-Strand Break Repair	SUMO1;H2AFX;ATM
Degradation of beta-catenin by the destruction complex	CSNK1A1		DNA methylation	H2AFX
Degradation of GLI2 by the proteasome	CSNK1A1		DNA Repair	RPS9;SUMO1;H2AFX;POLR2E;POLR2G;ATM
Deubiquitination	ARRB1;ARRB2		DNA Replication	POLA1;POLA2;PRIM1
Developmental Biology	EIF4A2;CLDND1;CUL2;CLTC;FYN;ATP6V1D		DNA replication initiation	POLA1;POLA2;PRIM1
Disassembly of the destruction complex and recruitment of AXIN to the membrane	CSNK1A1		DNA Replication Pre-Initiation	POLA1;POLA2;PRIM1
DNA Double Strand Break Response	SUMO1		DNA strand elongation	POLA1;POLA2;PRIM1
DNA Double-Strand Break Repair	SUMO1		Dual incision in TC-NER	POLR2E;POLR2G
DNA Repair	SUMO1;SUMO3		E2F mediated regulation of DNA replication	RB1;POLA1;POLA2;PRIM1
Downstream signal transduction	ATP6V1D		E3 ubiquitin ligases ubiquitinate target proteins	HLA-B
Downstream signaling of activated FGFR1	AP3M2;ATP6V1D		EML4 and NUDC in mitotic spindle formation	TUBB
Downstream signaling of activated FGFR2	AP3M2;ATP6V1D		Endosomal/Vacuolar pathway	HLA-B
Downstream signaling of activated FGFR3	ATP6V1D		Epigenetic regulation of gene expression	H2AFX;POLR2E;DDX21
Downstream signaling of activated FGFR4	AP3M2;ATP6V1D		ER to Golgi Anterograde Transport	TUBB
E3 ubiquitin ligases ubiquitinate target proteins	HLA-B		ERCC6 (CSB) and EHMT2 (G9a) positively regulate rRNA expression	H2AFX
Elastic fibre formation	AP3S2		ER-Phagosome pathway	HLA-B
EML4 and NUDC in mitotic spindle formation	BUB1B;BUB1		ESR-mediated signaling	SMARCC1;H2AFX;POLR2E;POLR2G;SMC1A;GTF2F2
Endosomal/Vacuolar pathway	HLA-B		Establishment of Sister Chromatid Cohesion	SMC1A
Entry of Influenza Virion into Host Cell via Endocytosis	CLTC		Estrogen biosynthesis	ARRB1
EPHA-mediated growth cone collapse	FYN		Estrogen-dependent gene expression	SMARCC1;H2AFX;POLR2E;POLR2G;SMC1A;GTF2F2
EPHB-mediated forward signaling	FYN		Eukaryotic Translation Elongation	RPS9
EPH-ephrin mediated repulsion of cells	CLTC;FYN		Eukaryotic Translation Initiation	RPS9
EPH-Ephrin signaling	CLTC;FYN		Eukaryotic Translation Termination	RPS9
Ephrin signaling	FYN		Extension of Telomeres	POLA1;POLA2;PRIM1
Epigenetic regulation of gene expression	RAB14		Extracellular matrix organization	RB1
ER to Golgi Anterograde Transport	ARF1;AP3D1		Factors involved in megakaryocyte development and platelet production	TUBB
ER-Phagosome pathway	HLA-B		Fatty acid metabolism	POLA2
Estrogen biosynthesis	ARRB1		FBXL7 down-regulates AURKA during mitotic entry and in early mitosis	ATP6V1A
Eukaryotic Translation Initiation	EIF4A2		FGFR2 alternative splicing	POLR2E;POLR2G;GTF2F2
Export of Viral Ribonucleoproteins from Nucleus	FLOT2		FGFR2 mutant receptor activation	POLR2E;POLR2G;GTF2F2
Extension of Telomeres	PIF1		FLT3 Signaling	ARRB1
Extracellular matrix organization	SLC2A1;AP3S2;CD47		Formation of a pool of free 40S subunits	RPS9
FBXL7 down-regulates AURKA during mitotic entry and in early mitosis	ATP6V1A		Formation of HIV elongation complex in the absence of HIV Tat	POLR2E;POLR2G;GTF2F2
Fc epsilon receptor (FCERI) signaling	FYN		Formation of HIV-1 elongation complex containing HIV-1 Tat	POLR2E;POLR2G;GTF2F2
Fcgamma receptor (FCGR) dependent phagocytosis	FYN		Formation of Incision Complex in GG-NER	SUMO1
FCGR activation	FYN		Formation of RNA Pol II elongation complex	POLR2E;POLR2G;GTF2F2
FCGR3A-mediated IL10 synthesis	FYN		Formation of Senescence-Associated Heterochromatin Foci (SAHF)	RB1
FCGR3A-mediated phagocytosis	FYN		Formation of TC-NER Pre-Incision Complex	POLR2E;POLR2G
FGFR1 ligand binding and activation	AP3M2		Formation of the beta-catenin:TCF transactivating complex	H2AFX
FGFR1 mutant receptor activation	AP3M2		Formation of the Early Elongation Complex	POLR2E;POLR2G;GTF2F2
FGFR1c ligand binding and activation	AP3M2		Formation of the HIV-1 Early Elongation Complex	POLR2E;POLR2G;GTF2F2
FGFR2 ligand binding and activation	AP3M2		Formation of the ternary complex, and subsequently, the 43S complex	RPS9
FGFR2 mutant receptor activation	AP3M2		Formation of tubulin folding intermediates by CCT/TriC	TUBB
FGFR2c ligand binding and activation	AP3M2		FOXO-mediated transcription	NR3C1
FGFR4 ligand binding and activation	AP3M2		FOXO-mediated transcription of oxidative stress, metabolic and neuronal genes	NR3C1
FLT3 Signaling	AP3M2;FYN;ARRB1;ARRB2;ATP6V1D		G alpha (s) signalling events	ARRB1
Formation of annular gap junctions	CLTC		G1 Phase	RB1
Formation of Fibrin Clot (Clotting Cascade)	AP3D1		G1/S DNA Damage Checkpoints	ATM
Formation of Incision Complex in GG-NER	SUMO1;SUMO3		G1/S Transition	RB1;POLA1;POLA2;PRIM1
Formation of the cornified envelope	ATP6V1D		G1/S-Specific Transcription	POLA1
FRS-mediated FGFR1 signaling	AP3M2;ATP6V1D		G2/M Checkpoints	SUMO1;H2AFX;ATM
FRS-mediated FGFR2 signaling	AP3M2;ATP6V1D		G2/M DNA damage checkpoint	SUMO1;H2AFX;ATM
FRS-mediated FGFR3 signaling	ATP6V1D		G2/M Transition	ATP6V1A;TUBB
FRS-mediated FGFR4 signaling	AP3M2;ATP6V1D		Gap junction assembly	TUBB
G alpha (12/13) signalling events	CD63;CLDND1		Gap junction trafficking	TUBB
G alpha (i) signalling events	ARRB2		Gap junction trafficking and regulation	TUBB
G alpha (s) signalling events	ARRB1;ARRB2		Gap-filling DNA repair synthesis and ligation in TC-NER	POLR2E;POLR2G
G beta:gamma signalling through CDC42	CD63		Gene expression (Transcription)	RB1;SMARCC1;SUMO1;H2AFX;POLR2E;DDX21;CHM;POLR2G;ATM;NR3C1;GTF2F2
G protein gated Potassium channels	ATIC		Gene Silencing by RNA	H2AFX;POLR2E;POLR2G
G2/M Checkpoints	SUMO1		Generic Transcription Pathway	RB1;SMARCC1;SUMO1;H2AFX;POLR2E;CHM;POLR2G;ATM;NR3C1;GTF2F2
G2/M DNA damage checkpoint	SUMO1		Global Genome Nucleotide Excision Repair (GG-NER)	RPS9;SUMO1
G2/M Transition	ATP6V1A		Glycosaminoglycan metabolism	RAB2A;GTF2F2
GAB1 signalosome	ATP6V1D		Glycosphingolipid metabolism	RAB2A
GABA B receptor activation	ATIC		Golgi Associated Vesicle Biogenesis	AP3B1;ARRB1
GABA receptor activation	ATIC		Golgi Cisternae Pericentriolar Stack Reorganization	RAB2A
Gap junction degradation	CLTC		Golgi-to-ER retrograde transport	TUBB
Gap junction trafficking	CLTC		GPCR downstream signalling	ARRB1
Gap junction trafficking and regulation	CLTC		GTP hydrolysis and joining of the 60S ribosomal subunit	RPS9
Gene and protein expression by JAK-STAT signaling after Interleukin-12 stimulation	ARF1		HCMV Early Events	TUBB
Gene expression (Transcription)	RAB14;SUMO1;FLOT2;SLC2A3;ARRB2;ATP6V1D		HCMV Infection	TUBB
Gene Silencing by RNA	FLOT2		HDR through Homologous Recombination (HRR)	ATM
Generic Transcription Pathway	SUMO1;SLC2A3;ARRB2;ATP6V1D		HDR through Homologous Recombination (HRR) or Single Strand Annealing (SSA)	SUMO1;H2AFX;ATM
GLI3 is processed to GLI3R by the proteasome	CSNK1A1		HDR through Single Strand Annealing (SSA)	ATM
Global Genome Nucleotide Excision Repair (GG-NER)	SUMO1;SUMO3		Hedgehog 'off' state	TUBB
Glucose metabolism	FLOT2		Hedgehog 'on' state	ARRB1
Glycolysis	FLOT2		Hemostasis	TUBB;ARRB1
Golgi Associated Vesicle Biogenesis	ARF1;AP1G1;CLTC;AP3B1;ARRB1;AP3S1;AP1M1		Heparan sulfate/heparin (HS-GAG) metabolism	RAB2A;GTF2F2
Golgi-to-ER retrograde transport	ARF1		HIV elongation arrest and recovery	POLR2E;POLR2G;GTF2F2
GPCR downstream signalling	CD63;CLDND1;ARRB1;ARRB2		HIV Infection	POLR2E;POLR2G;GTF2F2
GPCR ligand binding	ARRB2		HIV Life Cycle	POLR2E;POLR2G;GTF2F2
G-protein beta:gamma signalling	CD63		HIV Transcription Elongation	POLR2E;POLR2G;GTF2F2
GPVI-mediated activation cascade	FYN;ATP6V1D		HIV Transcription Initiation	POLR2E;POLR2G;GTF2F2
GTP hydrolysis and joining of the 60S ribosomal subunit	EIF4A2		Homologous DNA Pairing and Strand Exchange	ATM
HCMV Early Events	FLOT2		Homology Directed Repair	SUMO1;H2AFX;ATM
HCMV Infection	FLOT2		HS-GAG degradation	RAB2A
HCMV Late Events	FLOT2		HSP90 chaperone cycle for steroid hormone receptors (SHR)	TUBB;NR3C1
HDR through Homologous Recombination (HRR) or Single Strand Annealing (SSA)	SUMO1		Immune System	ATP6V1A;SMARCC1;SUMO1;DHX9;TUBB;CUL2;HLA-B;POLR2E;STOM;ARRB1;VHL
Hedgehog 'off' state	CSNK1A1		Immunoregulatory interactions between a Lymphoid and a non-Lymphoid cell	HLA-B
Hedgehog 'on' state	CSNK1A1;ARRB1;ARRB2		Infectious disease	RPS9;TUBB;POLR2E;POLR2G;GTF2F2
Hemostasis	CD63;AP3D1;ATP6V1B2;FYN;ARRB1;ARRB2;CD47;ATP6V1D		Influenza Infection	RPS9;POLR2E;POLR2G;GTF2F2
HIV Infection	ARF1;AP1G1;FLOT2;ATP6V1H;FYN;AP1M1		Influenza Viral RNA Transcription and Replication	RPS9;POLR2E;POLR2G;GTF2F2
HIV Life Cycle	FLOT2		Inhibition of replication initiation of damaged DNA by RB1/E2F1	RB1;POLA1;POLA2;PRIM1
Homology Directed Repair	SUMO1		Innate Immune System	ATP6V1A;DHX9;TUBB;HLA-B;POLR2E;STOM
Host Interactions of HIV factors	ARF1;AP1G1;FLOT2;ATP6V1H;FYN;AP1M1		Insulin receptor recycling	ATP6V1A
IGF1R signaling cascade	AP3M2		Integrin cell surface interactions	RB1
Immune System	EIF4A2;ATP6V1A;CD63;ARF1;CLDND1;CUL2;CLTC;SLC2A3;ARRB1;ARRB2;AP3M2;ATIC;SUMO1;AP1G1;STOM;FLOT2;ATP6V1H;FYN;ATP6V1E1;ATP6V1D;ATP6V1C1;ATP6V1F;AP1M1;HLA-B;DDOST;TSPAN14;RAB14;ATP6V1B2;CD47;ATP6V0D1;ATP6V1B1		Interferon alpha/beta signaling	HLA-B
Immunoregulatory interactions between a Lymphoid and a non-Lymphoid cell	HLA-B		Interferon gamma signaling	SUMO1;HLA-B
Inactivation of APC/C via direct inhibition of the APC/C complex	BUB1B;BUB1		Interferon Signaling	SUMO1;HLA-B
Infection with Mycobacterium tuberculosis	ATP6V1H		Interleukin-4 and Interleukin-13 signaling	SMARCC1
Infectious disease	ARF1;AP1G1;CLTC;FLOT2;ATP6V1H;FYN;AP1M1		Intraflagellar transport	TUBB
Influenza Infection	CLTC;FLOT2		Intra-Golgi and retrograde Golgi-to-ER traffic	TUBB;CUL2
Influenza Viral RNA Transcription and Replication	FLOT2		Intra-Golgi traffic	CUL2
Inhibition of voltage gated Ca2+ channels via Gbeta/gamma subunits	ATIC		Ion channel transport	ATP6V1A;STOM
Inhibition of the proteolytic activity of APC/C required for the onset of anaphase by mitotic spindle checkpoint components	BUB1B;BUB1		Iron uptake and transport	ATP6V1A
Innate Immune System	ATP6V1A;CD63;HLA-B;SLC2A3;DDOST;TSPAN14;ATIC;RAB14;ATP6V1B2;STOM;ATP6V1H;FYN;CD47;ATP6V1E1;ATP6V0D1;ATP6V1D;ATP6V1C1;ATP6V1F;ATP6V1B1;AP1M1		Keratan sulfate degradation	RAB2A
Insulin receptor recycling	ATP6V1A;ATP6V1B2;ATP6V1H;ATP6V1E1;ATP6V0D1;ATP6V1D;ATP6V1C1;ATP6V1F;ATP6V1B1		Keratan sulfate/keratin metabolism	RAB2A
Insulin receptor signalling cascade	AP3M2		Kinesins	TUBB
Integration of energy metabolism	EIF4A2;SLC2A1		L13a-mediated translational silencing of Ceruloplasmin expression	RPS9
Integrin cell surface interactions	CD47		L1CAM interactions	TUBB
Interactions of Rev with host cellular proteins	FLOT2		Lagging Strand Synthesis	POLA1;POLA2;PRIM1
Interactions of Vpr with host cellular proteins	FLOT2		Late Phase of HIV Life Cycle	POLR2E;POLR2G;GTF2F2
Interferon alpha/beta signaling	HLA-B;ATP6V1D		Leading Strand Synthesis	POLA1;POLA2;PRIM1
Interferon gamma signaling	SUMO1;HLA-B;ATP6V1D		Loss of Nlp from mitotic centrosomes	TUBB
Interferon Signaling	EIF4A2;SUMO1;HLA-B;FLOT2;ATP6V1D		Loss of proteins required for interphase microtubule organization from the centrosome	TUBB
Interleukin-1 family signaling	ATP6V1D		Lysosome Vesicle Biogenesis	ARRB1
Interleukin-12 family signaling	ARF1		M Phase	RB1;RAB2A;SUMO1;TUBB;H2AFX;SMC1A
Interleukin-12 signaling	ARF1		Macroautophagy	TUBB;ATM
Interleukin-15 signaling	CLDND1		Major pathway of rRNA processing in the nucleolus and cytosol	RPS9;NCL;DDX21
Interleukin-2 family signaling	CLDND1		MAP2K and MAPK activation	ARRB1
Interleukin-20 family signaling	ATP6V1D		MAPK family signaling cascades	ARRB1
Interleukin-3, Interleukin-5 and GM-CSF signaling	FYN;ATP6V1D		MAPK1/MAPK3 signaling	ARRB1
Interleukin-37 signaling	ATP6V1D		Meiosis	H2AFX;ATM;SMC1A
Interleukin-6 family signaling	ATP6V1D		Meiotic recombination	H2AFX;ATM
Interleukin-6 signaling	ATP6V1D		Meiotic synapsis	H2AFX;SMC1A
Intracellular signaling by second messengers	AP3M2;AP1G1;FYN		Membrane Trafficking	TUBB;CUL2;CHM;AP3B1;ARRB1;ARF6
Intra-Golgi and retrograde Golgi-to-ER traffic	ARF1;CUL2		MET receptor recycling	ARF6
Intra-Golgi traffic	ARF1;CUL2		Metabolic disorders of biological oxidation enzymes	POLA2
Intrinsic Pathway of Fibrin Clot Formation	AP3D1		Metabolism	RAB2A;RPS9;POLA2;H2AFX;ARRB1;GTF2F2
Inwardly rectifying K+ channels	ATIC		Metabolism of amino acids and derivatives	RPS9
Ion channel transport	ATP6V1A;FXYD1;ATP6V1B2;STOM;ATP6V1H;ATP6V1E1;ATP6V0D1;ATP6V1D;ATP6V1C1;ATP6V1F;ATP6V1B1		Metabolism of carbohydrates	RAB2A;GTF2F2
Ion homeostasis	FXYD1		Metabolism of lipids	RAB2A;POLA2;H2AFX;ARRB1
Ion transport by P-type ATPases	FXYD1		Metabolism of proteins	RAB2A;ATP6V1A;RPS9;TUBB;CUL2;H2AFX;HLA-B;CHM;ARRB1;TBCA;NR3C1;SMC1A;SUMO1;SP3;VHL;TOP1
IRE1alpha activates chaperones	ATP6V0D1		Metabolism of RNA	SF3A1;RPS9;PUF60;DHX9;NCL;POLR2E;DDX21;POLR2G;GTF2F2
Iron uptake and transport	ATP6V1A;ATP6V1B2;ATP6V1H;ATP6V1E1;ATP6V0D1;ATP6V1D;ATP6V1C1;ATP6V1F;ATP6V1B1		Metabolism of steroid hormones	ARRB1
IRS-mediated signalling	AP3M2		Metabolism of steroids	ARRB1
IRS-related events triggered by IGF1R	AP3M2		Metalloprotease DUBs	H2AFX
ISG15 antiviral mechanism	EIF4A2;FLOT2		MHC class II antigen presentation	TUBB
Keratinization	ATP6V1D		MicroRNA (miRNA) biogenesis	POLR2E;POLR2G
L13a-mediated translational silencing of Ceruloplasmin expression	EIF4A2		Microtubule-dependent trafficking of connexons from Golgi to the plasma membrane	TUBB
L1CAM interactions	CLTC		Miscellaneous substrates	POLA2
Lactose synthesis	SLC2A1		Mitotic Anaphase	SUMO1;TUBB;SMC1A
Late Phase of HIV Life Cycle	FLOT2		Mitotic G1 phase and G1/S transition	RB1;POLA1;POLA2;PRIM1
LDL clearance	CLTC		Mitotic G2-G2/M phases	ATP6V1A;TUBB
Leishmania infection	FYN		Mitotic Metaphase and Anaphase	SUMO1;TUBB;SMC1A
Leishmania parasite growth and survival	FYN		Mitotic Prometaphase	TUBB;SMC1A
Leishmania phagocytosis	FYN		Mitotic Prophase	RB1;RAB2A;H2AFX
Lysosome Vesicle Biogenesis	ARF1;AP1G1;CLTC;ARRB1;AP1M1		Mitotic Telophase/Cytokinesis	SMC1A
M Phase	SUMO1;FLOT2;BUB1B;BUB1		mRNA Capping	POLR2E;POLR2G;GTF2F2
MAP2K and MAPK activation	ARRB1;ARRB2		mRNA Splicing	SF3A1;PUF60;DHX9;POLR2E;POLR2G;GTF2F2
MAPK family signaling cascades	AP3M2;FYN;ARRB1;ARRB2		mRNA Splicing - Major Pathway	SF3A1;PUF60;DHX9;POLR2E;POLR2G;GTF2F2
MAPK1/MAPK3 signaling	AP3M2;FYN;ARRB1;ARRB2		mRNA Splicing - Minor Pathway	POLR2E;POLR2G;GTF2F2
MECP2 regulates neuronal receptors and channels	SLC2A3		Multifunctional anion exchangers	SMC1A
MECP2 regulates transcription of neuronal ligands	ARRB2		Muscle contraction	PUF60;DDX21
Membrane Trafficking	ARF1;RAB14;AP1G1;CUL2;CLTC;AP3D1;AP3B1;ARRB1;ARRB2;AP3S1;ARF6;AP1M1		Neddylation	ATP6V1A;CUL2;VHL
MET activates PTPN11	ATP6V1D		Negative epigenetic regulation of rRNA expression	H2AFX;POLR2E
MET receptor recycling	ARF6		Negative regulation of activity of TFAP2 (AP-2) family transcription factors	SUMO1
Metabolism	EIF4A2;ARF1;ATIC;RAB14;SLC2A1;FLOT2;SLC2A3;ARRB1;BUB1		Nervous system development	RPS9;TUBB;CUL2
Metabolism of amino acids and derivatives	BUB1		Neuronal System	TUBB
Metabolism of carbohydrates	SLC2A1;FLOT2		Neurotransmitter receptors and postsynaptic signal transmission	TUBB
Metabolism of lipids	ARF1;RAB14;ARRB1		Neutrophil degranulation	TUBB;HLA-B;STOM
Metabolism of non-coding RNA	FLOT2		Nonhomologous End-Joining (NHEJ)	SUMO1;H2AFX;ATM
Metabolism of nucleotides	ATIC		Nonsense Mediated Decay (NMD) enhanced by the Exon Junction Complex (EJC)	RPS9
Metabolism of polyamines	BUB1		Nonsense Mediated Decay (NMD) independent of the Exon Junction Complex (EJC)	RPS9
Metabolism of proteins	EIF4A2;ATP6V1A;ARF1;CUL2;HLA-B;AP3D1;ARRB1;ARRB2;DDOST;TUFM;TSPAN14;RAB14;SUMO1;SUMO3;FLOT2;ATP6V0D1		Nonsense-Mediated Decay (NMD)	RPS9
Metabolism of RNA	EIF4A2;PUF60;FLOT2		NoRC negatively regulates rRNA expression	H2AFX;POLR2E
Metabolism of steroid hormones	ARRB1		Nuclear Envelope (NE) Reassembly	SUMO1;TUBB
Metabolism of steroids	ARRB1		Nuclear Receptor transcription pathway	NR3C1
Metabolism of vitamins and cofactors	SLC2A1;SLC2A3		Nucleosome assembly	H2AFX
Metabolism of water-soluble vitamins and cofactors	SLC2A1;SLC2A3		Nucleotide Excision Repair	RPS9;SUMO1;POLR2E;POLR2G
MHC class II antigen presentation	ARF1;AP1G1;CLTC;AP1M1		Oncogene Induced Senescence	RB1
Miscellaneous transport and binding events	LRRC8A		Oncogenic MAPK signaling	AP3B1;ARRB1
Misspliced GSK3beta mutants stabilize beta-catenin	CSNK1A1		Organelle biogenesis and maintenance	TUBB
Mitochondrial translation	TUFM		Oxidative Stress Induced Senescence	H2AFX
Mitochondrial translation elongation	TUFM		Oxygen-dependent proline hydroxylation of Hypoxia-inducible Factor Alpha	CUL2;VHL
Mitotic Anaphase	SUMO1;BUB1B;BUB1		p53-Dependent G1 DNA Damage Response	ATM
Mitotic G2-G2/M phases	ATP6V1A		p53-Dependent G1/S DNA damage checkpoint	ATM
Mitotic Metaphase and Anaphase	SUMO1;BUB1B;BUB1		Packaging Of Telomere Ends	H2AFX
Mitotic Prometaphase	BUB1B;BUB1		Paradoxical activation of RAF signaling by kinase inactive BRAF	ARRB1
Mitotic Prophase	FLOT2		Pausing and recovery of HIV elongation	POLR2E;POLR2G;GTF2F2
Mitotic Spindle Checkpoint	BUB1B;BUB1		Pausing and recovery of Tat-mediated HIV elongation	POLR2E;POLR2G;GTF2F2
Molecules associated with elastic fibres	AP3S2		Peptide chain elongation	RPS9
mRNA Splicing	PUF60		Pexophagy	ATM
mRNA Splicing - Major Pathway	PUF60		Phase I - Functionalization of compounds	POLA2
Muscle contraction	PUF60;FXYD1		Phosphorylation of proteins involved in G1/S transition by active Cyclin E:Cdk2 complexes	RB1
MyD88-independent TLR4 cascade	ATP6V1D		PIWI-interacting RNA (piRNA) biogenesis	POLR2E;POLR2G
NCAM signaling for neurite out-growth	FYN		Platelet activation, signaling and aggregation	ARRB1
Neddylation	ATP6V1A;CUL2		Polymerase switching	POLA1;POLA2;PRIM1
Nef and signal transduction	FYN		Polymerase switching on the C-strand of the telomere	POLA1;POLA2;PRIM1
Nef Mediated CD4 Down-regulation	ARF1;ATP6V1H		Positive epigenetic regulation of rRNA expression	H2AFX;POLR2E;DDX21
Nef Mediated CD8 Down-regulation	ATP6V1H		Post NMDA receptor activation events	TUBB
Nef mediated downregulation of MHC class I complex cell surface expression	AP1G1;AP1M1		Post-chaperonin tubulin folding pathway	TUBB;TBCA
Nef-mediates down modulation of cell surface receptors by recruiting them to clathrin adapters	ARF1;AP1G1;ATP6V1H;AP1M1		Postmitotic nuclear pore complex (NPC) reformation	SUMO1
Negative epigenetic regulation of rRNA expression	RAB14		Post-translational protein modification	RAB2A;ATP6V1A;RPS9;TUBB;CUL2;H2AFX;HLA-B;CHM;ARRB1;NR3C1;SMC1A;SUMO1;SP3;VHL;TOP1
Negative regulation of activity of TFAP2 (AP-2) family transcription factors	SUMO1		PRC2 methylates histones and DNA	H2AFX
Negative regulation of FGFR1 signaling	AP3M2;ATP6V1D		Prefoldin mediated transfer of substrate to CCT/TriC	TUBB
Negative regulation of FGFR2 signaling	AP3M2;ATP6V1D		Pre-NOTCH Expression and Processing	H2AFX
Negative regulation of FGFR3 signaling	ATP6V1D		Pre-NOTCH Transcription and Translation	H2AFX
Negative regulation of FGFR4 signaling	AP3M2;ATP6V1D		Presynaptic phase of homologous DNA pairing and strand exchange	ATM
Negative regulation of the PI3K/AKT network	AP3M2;AP1G1;FYN		Processing and activation of SUMO	SUMO1
NEP/NS2 Interacts with the Cellular Export Machinery	FLOT2		Processing of Capped Intron-Containing Pre-mRNA	SF3A1;PUF60;DHX9;POLR2E;POLR2G;GTF2F2
Nephrin family interactions	FYN		Processing of DNA double-strand break ends	SUMO1;H2AFX;ATM
Nervous system development	CLDND1;CUL2;CLTC;FYN;ATP6V1D		Processive synthesis on the lagging strand	POLA1;POLA2;PRIM1
Netrin mediated repulsion signals	ATP6V1D		Protein folding	TUBB;TBCA
Netrin-1 signaling	FYN;ATP6V1D		Protein ubiquitination	HLA-B
Neuronal System	ATIC;FLOT2		PTK6 Expression	NR3C1
Neurotransmitter receptors and postsynaptic signal transmission	ATIC		RAB GEFs exchange GTP for GDP on RABs	CHM
Neutrophil degranulation	CD63;TSPAN14;ATIC;RAB14;HLA-B;STOM;SLC2A3;CD47;ATP6V1D;DDOST;AP1M1		RAB geranylgeranylation	RAB2A;CUL2;CHM
Nonhomologous End-Joining (NHEJ)	SUMO1		Rab regulation of trafficking	CHM;ARF6
NoRC negatively regulates rRNA expression	RAB14		RAF/MAP kinase cascade	ARRB1
NRAGE signals death through JNK	CD63;CLDND1		Recognition and association of DNA glycosylase with site containing an affected purine	H2AFX
NS1 Mediated Effects on Host Pathways	FLOT2		Recognition and association of DNA glycosylase with site containing an affected pyrimidine	H2AFX
NTRK2 activates RAC1	FYN		Recruitment and ATM-mediated phosphorylation of repair and signaling proteins at DNA double strand breaks	SUMO1;H2AFX;ATM
Nuclear Envelope (NE) Reassembly	SUMO1		Recruitment of mitotic centrosome proteins and complexes	TUBB
Nuclear Envelope Breakdown	FLOT2		Recruitment of NuMA to mitotic centrosomes	TUBB
Nuclear import of Rev protein	FLOT2		Recycling pathway of L1	TUBB
Nuclear Pore Complex (NPC) Disassembly	FLOT2		Regulation of expression of SLITs and ROBOs	RPS9;CUL2
Nucleobase biosynthesis	ATIC		Regulation of HSF1-mediated heat shock response	ATM
Nucleotide Excision Repair	SUMO1;SUMO3		Regulation of IFNG signaling	SUMO1
Oncogenic MAPK signaling	AP3B1;ARRB1;ARRB2		Regulation of PLK1 Activity at G2/M Transition	TUBB
Organelle biogenesis and maintenance	CSNK1A1		Regulation of RUNX2 expression and activity	NR3C1
Oxygen-dependent proline hydroxylation of Hypoxia-inducible Factor Alpha	CUL2		Regulation of TP53 Activity	ATM
p75 NTR receptor-mediated signalling	CD63;CLDND1		Regulation of TP53 Activity through Methylation	ATM
Paradoxical activation of RAF signaling by kinase inactive BRAF	ARRB1;ARRB2		Regulation of TP53 Activity through Phosphorylation	ATM
Parasite infection	FYN		Regulation of TP53 Degradation	ATM
PCP/CE pathway	CLTC;ARRB2		Regulation of TP53 Expression and Degradation	ATM
PD-1 signaling	ATP6V1D		Removal of the Flap Intermediate	POLA1;POLA2;PRIM1
PECAM1 interactions	FYN;ATP6V1D		Reproduction	H2AFX;ATM;SMC1A
Peptide ligand-binding receptors	ARRB2		Resolution of D-Loop Structures	ATM
Phospholipase C-mediated cascade: FGFR1	AP3M2		Resolution of D-loop Structures through Holliday Junction Intermediates	ATM
Phospholipase C-mediated cascade; FGFR2	AP3M2		Resolution of D-loop Structures through Synthesis-Dependent Strand Annealing (SDSA)	ATM
Phospholipase C-mediated cascade; FGFR4	AP3M2		Resolution of Sister Chromatid Cohesion	TUBB;SMC1A
Phospholipid metabolism	ARF1;RAB14		Response of EIF2AK4 (GCN2) to amino acid deficiency	RPS9
phosphorylation site mutants of CTNNB1 are not targeted to the proteasome by the destruction complex	CSNK1A1		RHO GTPase Effectors	TUBB;H2AFX
PI Metabolism	ARF1;RAB14		RHO GTPases Activate Formins	TUBB
PI3K Cascade	AP3M2		RHO GTPases activate IQGAPs	TUBB
PI-3K cascade:FGFR1	AP3M2		RHO GTPases activate PKNs	H2AFX
PI-3K cascade:FGFR2	AP3M2		Ribosomal scanning and start codon recognition	RPS9
PI-3K cascade:FGFR4	AP3M2		RIP-mediated NFkB activation via ZBP1	DHX9
PI3K/AKT Signaling in Cancer	AP3M2;FYN		RMTs methylate histone arginines	SMARCC1;H2AFX
PI5P, PP2A and IER3 Regulate PI3K/AKT Signaling	AP3M2;FYN		RNA Pol II CTD phosphorylation and interaction with CE	POLR2E;POLR2G;GTF2F2
PIP3 activates AKT signaling	AP3M2;AP1G1;FYN		RNA Pol II CTD phosphorylation and interaction with CE during HIV infection	POLR2E;POLR2G;GTF2F2
Plasma lipoprotein assembly, remodeling, and clearance	CLTC		RNA Polymerase I Promoter Clearance	H2AFX;POLR2E
Plasma lipoprotein clearance	CLTC		RNA Polymerase I Promoter Escape	H2AFX;POLR2E
Platelet activation, signaling and aggregation	CD63;AP3D1;ATP6V1B2;FYN;ARRB1;ARRB2;ATP6V1D		RNA Polymerase I Promoter Opening	H2AFX
Platelet Adhesion to exposed collagen	FYN		RNA Polymerase I Transcription	H2AFX;POLR2E
Platelet degranulation	CD63;AP3D1;ATP6V1B2		RNA Polymerase I Transcription Initiation	POLR2E
Platelet homeostasis	ATP6V1D		RNA Polymerase I Transcription Termination	POLR2E
Platelet sensitization by LDL	ATP6V1D		RNA Polymerase II HIV Promoter Escape	POLR2E;POLR2G;GTF2F2
Positive epigenetic regulation of rRNA expression	RAB14		RNA Polymerase II Pre-transcription Events	POLR2E;POLR2G;GTF2F2
Postmitotic nuclear pore complex (NPC) reformation	SUMO1		RNA Polymerase II Promoter Escape	POLR2E;POLR2G;GTF2F2
Post-translational protein modification	ATP6V1A;ARF1;RAB14;SUMO1;SUMO3;CUL2;HLA-B;AP3D1;FLOT2;ARRB1;ARRB2;DDOST		RNA polymerase II transcribes snRNA genes	SMARCC1;POLR2E;POLR2G;GTF2F2
Potassium Channels	ATIC		RNA Polymerase II Transcription	RB1;SMARCC1;SUMO1;H2AFX;POLR2E;CHM;POLR2G;ATM;NR3C1;GTF2F2
Processing and activation of SUMO	SUMO1;SUMO3		RNA Polymerase II Transcription Elongation	POLR2E;POLR2G;GTF2F2
Processing of Capped Intron-Containing Pre-mRNA	PUF60;FLOT2		RNA Polymerase II Transcription Initiation	POLR2E;POLR2G;GTF2F2
Processing of DNA double-strand break ends	SUMO1		RNA Polymerase II Transcription Initiation And Promoter Clearance	POLR2E;POLR2G;GTF2F2
Prolactin receptor signaling	ATP6V1D		RNA Polymerase II Transcription Pre-Initiation And Promoter Opening	POLR2E;POLR2G;GTF2F2
Protein ubiquitination	HLA-B		RNA Polymerase III Abortive And Retractive Initiation	SMARCC1;POLR2E
Protein-protein interactions at synapses	FLOT2		RNA Polymerase III Chain Elongation	POLR2E
Purine ribonucleoside monophosphate biosynthesis	ATIC		RNA Polymerase III Transcription	SMARCC1;POLR2E
RAB GEFs exchange GTP for GDP on RABs	RAB14		RNA Polymerase III Transcription Initiation	SMARCC1;POLR2E
RAB geranylgeranylation	RAB14;CUL2		RNA Polymerase III Transcription Initiation From Type 1 Promoter	POLR2E
Rab regulation of trafficking	RAB14;ARF6		RNA Polymerase III Transcription Initiation From Type 2 Promoter	POLR2E
RAF/MAP kinase cascade	AP3M2;FYN;ARRB1;ARRB2		RNA Polymerase III Transcription Initiation From Type 3 Promoter	SMARCC1;POLR2E
Recruitment and ATM-mediated phosphorylation of repair and signaling proteins at DNA double strand breaks	SUMO1		RNA Polymerase III Transcription Termination	POLR2E
Recycling pathway of L1	CLTC		ROS and RNS production in phagocytes	ATP6V1A
Reelin signalling pathway	FYN		rRNA modification in the nucleus and cytosol	RPS9
Regulation of APC/C activators between G1/S and early anaphase	BUB1B;BUB1		rRNA processing	RPS9;NCL;DDX21
Regulation of cytoskeletal remodeling and cell spreading by IPP complex components	CD63		rRNA processing in the nucleus and cytosol	RPS9;NCL;DDX21
Regulation of expression of SLITs and ROBOs	CUL2		RUNX1 interacts with co-factors whose precise effect on RUNX1 targets is not known	SMARCC1
Regulation of Glucokinase by Glucokinase Regulatory Protein	FLOT2		RUNX1 regulates genes involved in megakaryocyte differentiation and platelet function	H2AFX
Regulation of HSF1-mediated heat shock response	FLOT2		RUNX1 regulates transcription of genes involved in differentiation of HSCs	H2AFX
Regulation of IFNA signaling	ATP6V1D		RUNX2 regulates bone development	RB1
Regulation of IFNG signaling	SUMO1;ATP6V1D		RUNX2 regulates osteoblast differentiation	RB1
Regulation of insulin secretion	SLC2A1		S Phase	RB1;POLA1;POLA2;PRIM1;SMC1A
Regulation of KIT signaling	FYN		Sealing of the nuclear envelope (NE) by ESCRT-III	TUBB
Regulation of mitotic cell cycle	BUB1B;BUB1		Selective autophagy	TUBB;ATM
Regulation of ornithine decarboxylase (ODC)	BUB1		Selenoamino acid metabolism	RPS9
Regulation of RUNX1 Expression and Activity	ATP6V1D		Selenocysteine synthesis	RPS9
Regulation of signaling by CBL	FYN		Senescence-Associated Secretory Phenotype (SASP)	H2AFX
Resolution of Sister Chromatid Cohesion	BUB1B;BUB1		Sensing of DNA Double Strand Breaks	ATM
Response of Mtb to phagocytosis	ATP6V1H		Separation of Sister Chromatids	TUBB;SMC1A
Response to elevated platelet cytosolic Ca2+	CD63;AP3D1;ATP6V1B2		Signal Transduction	ATP6V1A;SMARCC1;TUBB;H2AFX;POLR2E;POLR2G;ARRB1;NR3C1;SMC1A;GTF2F2;ARF6
RET signaling	ATP6V1D		Signaling by BRAF and RAF fusions	AP3B1;ARRB1
Retrograde neurotrophin signalling	CLTC;LANCL1		Signaling by FGFR	POLR2E;POLR2G;GTF2F2
Rev-mediated nuclear export of HIV RNA	FLOT2		Signaling by FGFR in disease	POLR2E;POLR2G;GTF2F2
Rho GTPase cycle	CD63;CLDND1		Signaling by FGFR2	POLR2E;POLR2G;GTF2F2
RHO GTPase Effectors	BUB1B;BUB1		Signaling by FGFR2 IIIa TM	POLR2E;POLR2G;GTF2F2
RHO GTPases Activate Formins	BUB1B;BUB1		Signaling by FGFR2 in disease	POLR2E;POLR2G;GTF2F2
Ribosomal scanning and start codon recognition	EIF4A2		Signaling by GPCR	ARRB1
RNA Polymerase I Promoter Clearance	RAB14		Signaling by Hedgehog	TUBB;ARRB1
RNA Polymerase I Promoter Escape	RAB14		Signaling by high-kinase activity BRAF mutants	ARRB1
RNA Polymerase I Transcription	RAB14		Signaling by Insulin receptor	ATP6V1A
RNA Polymerase I Transcription Initiation	RAB14		Signaling by Interleukins	SMARCC1
RNA Polymerase I Transcription Termination	RAB14		Signaling by MET	ARF6
RNA Polymerase II Transcription	SUMO1;SLC2A3;ARRB2;ATP6V1D		Signaling by moderate kinase activity BRAF mutants	ARRB1
Role of LAT2/NTAL/LAB on calcium mobilization	FYN		Signaling by Non-Receptor Tyrosine Kinases	NR3C1
ROS and RNS production in phagocytes	ATP6V1A;ATP6V1B2;ATP6V1H;ATP6V1E1;ATP6V0D1;ATP6V1D;ATP6V1C1;ATP6V1F;ATP6V1B1		Signaling by NOTCH	H2AFX;ARRB1
S33 mutants of beta-catenin aren't phosphorylated	CSNK1A1		Signaling by NOTCH1	ARRB1
S37 mutants of beta-catenin aren't phosphorylated	CSNK1A1		Signaling by Nuclear Receptors	SMARCC1;H2AFX;POLR2E;POLR2G;SMC1A;GTF2F2
S45 mutants of beta-catenin aren't phosphorylated	CSNK1A1		Signaling by PTK6	NR3C1
Sema3A PAK dependent Axon repulsion	FYN		Signaling by RAS mutants	ARRB1
SEMA3A-Plexin repulsion signaling by inhibiting Integrin adhesion	FYN		Signaling by Receptor Tyrosine Kinases	ATP6V1A;POLR2E;POLR2G;GTF2F2;ARF6
Semaphorin interactions	FYN		Signaling by Rho GTPases	TUBB;H2AFX
Separation of Sister Chromatids	BUB1B;BUB1		Signaling by ROBO receptors	RPS9;CUL2
SHC-mediated cascade:FGFR1	AP3M2		Signaling by WNT	H2AFX
SHC-mediated cascade:FGFR2	AP3M2		Signaling downstream of RAS mutants	ARRB1
SHC-mediated cascade:FGFR4	AP3M2		SIRT1 negatively regulates rRNA expression	H2AFX
Signal regulatory protein family interactions	CD47;ATP6V1D		SLC transporter disorders	SMC1A
Signal Transduction	ATP6V1A;CD63;CLDND1;CSNK1A1;CLTC;LANCL1;BUB1B;ARRB1;ARRB2;AP3M2;AP1G1;ATP6V1B2;ATP6V1H;FYN;ATP6V1E1;ATP6V0D1;BUB1;ATP6V1D;ATP6V1C1;ATP6V1F;ATP6V1B1;ARF6		SLC-mediated transmembrane transport	SMC1A;GTF2F2
Signaling by activated point mutants of FGFR1	AP3M2		Smooth Muscle Contraction	PUF60
Signaling by BRAF and RAF fusions	AP3B1;ARRB1;ARRB2		Sphingolipid metabolism	RAB2A
Signaling by EGFR	ATP6V1D		SRP-dependent cotranslational protein targeting to membrane	RPS9
Signaling by ERBB2	FYN		Stabilization of p53	ATM
Signaling by FGFR	AP3M2;ATP6V1D		Stimuli-sensing channels	STOM
Signaling by FGFR in disease	AP3M2		Striated Muscle Contraction	DDX21
Signaling by FGFR1	AP3M2;ATP6V1D		SUMO E3 ligases SUMOylate target proteins	SUMO1;SP3;VHL;TOP1;NR3C1;SMC1A
Signaling by FGFR1 in disease	AP3M2		SUMO is conjugated to E1 (UBA2:SAE1)	SUMO1
Signaling by FGFR2	AP3M2;ATP6V1D		SUMO is proteolytically processed	SUMO1
Signaling by FGFR2 in disease	AP3M2		SUMO is transferred from E1 to E2 (UBE2I, UBC9)	SUMO1
Signaling by FGFR3	ATP6V1D		SUMOylation	SUMO1;SP3;VHL;TOP1;NR3C1;SMC1A
Signaling by FGFR4	AP3M2;ATP6V1D		SUMOylation of chromatin organization proteins	SUMO1
Signaling by GPCR	CD63;CLDND1;ARRB1;ARRB2		SUMOylation of DNA damage response and repair proteins	SUMO1;SMC1A
Signaling by Hedgehog	CSNK1A1;ARRB1;ARRB2		SUMOylation of DNA methylation proteins	SUMO1
Signaling by high-kinase activity BRAF mutants	ARRB1;ARRB2		SUMOylation of DNA replication proteins	SUMO1;TOP1
Signaling by Insulin receptor	AP3M2;ATP6V1A;ATP6V1B2;ATP6V1H;ATP6V1E1;ATP6V0D1;ATP6V1D;ATP6V1C1;ATP6V1F;ATP6V1B1		SUMOylation of immune response proteins	SUMO1
Signaling by Interleukins	ARF1;CLDND1;FYN;ATP6V1D		SUMOylation of intracellular receptors	SUMO1;NR3C1
Signaling by Leptin	ATP6V1D		SUMOylation of RNA binding proteins	SUMO1
Signaling by MET	ATP6V1D;ARF6		SUMOylation of SUMOylation proteins	SUMO1
Signaling by moderate kinase activity BRAF mutants	ARRB1;ARRB2		SUMOylation of transcription cofactors	SUMO1
Signaling by NOTCH	ARRB1;ARRB2		SUMOylation of transcription factors	SUMO1;SP3
Signaling by NOTCH1	ARRB1;ARRB2		SUMOylation of ubiquitinylation proteins	SUMO1;VHL
Signaling by NTRK1 (TRKA)	CLTC;LANCL1		Synthesis of (16-20)-hydroxyeicosatetraenoic acids (HETE)	POLA2
Signaling by NTRK2 (TRKB)	FYN;ATP6V1D		Synthesis of DNA	POLA1;POLA2;PRIM1
Signaling by NTRKs	CLTC;LANCL1;FYN;ATP6V1D		Tat-mediated elongation of the HIV-1 transcript	POLR2E;POLR2G;GTF2F2
Signaling by PDGF	ATP6V1D		Tat-mediated HIV elongation arrest and recovery	POLR2E;POLR2G;GTF2F2
Signaling by RAS mutants	ARRB1;ARRB2		TBC/RABGAPs	ARF6
Signaling by Receptor Tyrosine Kinases	ATP6V1A;CLTC;LANCL1;AP3M2;ATP6V1B2;ATP6V1H;FYN;ATP6V1E1;ATP6V0D1;ATP6V1D;ATP6V1C1;ATP6V1F;ATP6V1B1;ARF6		TCF dependent signaling in response to WNT	H2AFX
Signaling by Rho GTPases	CD63;CLDND1;BUB1B;BUB1		Telomere C-strand (Lagging Strand) Synthesis	POLA1;POLA2;PRIM1
Signaling by ROBO receptors	CLDND1;CUL2		Telomere C-strand synthesis initiation	POLA1;POLA2;PRIM1
Signaling by SCF-KIT	FYN;ATP6V1D		Telomere Maintenance	POLA1;POLA2;PRIM1;H2AFX
Signaling by the B Cell Receptor (BCR)	FYN		The role of GTSE1 in G2/M progression after G2 checkpoint	TUBB
Signaling by Type 1 Insulin-like Growth Factor 1 Receptor (IGF1R)	AP3M2		Thrombin signalling through proteinase activated receptors (PARs)	ARRB1
Signaling by VEGF	FYN		TP53 Regulates Transcription of Caspase Activators and Caspases	ATM
Signaling by WNT	CSNK1A1;CLTC;ARRB2		TP53 Regulates Transcription of Cell Death Genes	CHM;ATM
Signaling by WNT in cancer	CSNK1A1		TP53 Regulates Transcription of DNA Repair Genes	POLR2E;POLR2G;ATM;GTF2F2
Signaling downstream of RAS mutants	ARRB1;ARRB2		TP53 Regulates Transcription of Genes Involved in Cytochrome C Release	ATM
SLC transporter disorders	SLC2A1;FLOT2		TP53 regulates transcription of several additional cell death genes whose specific roles in p53-dependent apoptosis remain uncertain	CHM
SLC-mediated transmembrane transport	SLC2A1;SLC2A3		Transcription of the HIV genome	POLR2E;POLR2G;GTF2F2
Smooth Muscle Contraction	PUF60		Transcriptional regulation by RUNX1	SMARCC1;H2AFX
snRNP Assembly	FLOT2		Transcriptional regulation by RUNX2	RB1;NR3C1
Spry regulation of FGF signaling	ATP6V1D		Transcriptional regulation by small RNAs	H2AFX;POLR2E;POLR2G
SRP-dependent cotranslational protein targeting to membrane	DDOST		Transcriptional regulation by the AP-2 (TFAP2) family of transcription factors	SUMO1
STAT5 Activation	ATP6V1D		Transcriptional Regulation by TP53	POLR2E;CHM;POLR2G;ATM;GTF2F2
Stimuli-sensing channels	STOM		Transcriptional regulation of granulopoiesis	H2AFX
SUMO E3 ligases SUMOylate target proteins	SUMO1;SUMO3;FLOT2		Transcription-Coupled Nucleotide Excision Repair (TC-NER)	POLR2E;POLR2G
SUMO is conjugated to E1 (UBA2:SAE1)	SUMO1;SUMO3		Transferrin endocytosis and recycling	ATP6V1A
SUMO is proteolytically processed	SUMO1;SUMO3		trans-Golgi Network Vesicle Budding	AP3B1;ARRB1
SUMO is transferred from E1 to E2 (UBE2I, UBC9)	SUMO1;SUMO3		Translation	RPS9
SUMOylation	SUMO1;SUMO3;FLOT2		Translation initiation complex formation	RPS9
SUMOylation of chromatin organization proteins	SUMO1;SUMO3;FLOT2		Translocation of SLC2A4 (GLUT4) to the plasma membrane	TUBB
SUMOylation of DNA damage response and repair proteins	SUMO1;SUMO3;FLOT2		Transmission across Chemical Synapses	TUBB
SUMOylation of DNA methylation proteins	SUMO1		Transport of connexons to the plasma membrane	TUBB
SUMOylation of DNA replication proteins	SUMO1;SUMO3;FLOT2		Transport of inorganic cations/anions and amino acids/oligopeptides	SMC1A
SUMOylation of immune response proteins	SUMO1;SUMO3		Transport of small molecules	ATP6V1A;STOM;SMC1A;GTF2F2
SUMOylation of intracellular receptors	SUMO1;SUMO3		Transport to the Golgi and subsequent modification	TUBB
SUMOylation of RNA binding proteins	SUMO1;FLOT2		Ub-specific processing proteases	H2AFX;ARRB1
SUMOylation of SUMOylation proteins	SUMO1;FLOT2		UCH proteinases	RPS9;H2AFX
SUMOylation of transcription cofactors	SUMO1;SUMO3		Vesicle-mediated transport	TUBB;CUL2;CHM;AP3B1;ARRB1;ARF6
SUMOylation of transcription factors	SUMO1;SUMO3		Viral Messenger RNA Synthesis	POLR2E;POLR2G;GTF2F2
SUMOylation of ubiquitinylation proteins	SUMO1;FLOT2		Viral mRNA Translation	RPS9
Suppression of phagosomal maturation	ATP6V1H		Wax and plasmalogen biosynthesis	H2AFX
Synaptic adhesion-like molecules	FLOT2		Wax biosynthesis	H2AFX
Synthesis of PIPs at the Golgi membrane	ARF1		ZBP1(DAI) mediated induction of type I IFNs	DHX9
Synthesis of PIPs at the plasma membrane	ARF1;RAB14
T41 mutants of beta-catenin aren't phosphorylated	CSNK1A1
TBC/RABGAPs	ARF6
TCF dependent signaling in response to WNT	CSNK1A1
Telomere Extension By Telomerase	PIF1
Telomere Maintenance	PIF1
The role of Nef in HIV-1 replication and disease pathogenesis	ARF1;AP1G1;ATP6V1H;FYN;AP1M1
Thrombin signalling through proteinase activated receptors (PARs)	ARRB1;ARRB2
Tie2 Signaling	ATP6V1D
Toll Like Receptor 4 (TLR4) Cascade	ATP6V1D
Toll-like Receptor Cascades	ATP6V1D
Transcriptional Regulation by MECP2	SLC2A3;ARRB2
Transcriptional regulation by RUNX1	ATP6V1D
Transcriptional regulation by small RNAs	FLOT2
Transcriptional regulation by the AP-2 (TFAP2) family of transcription factors	SUMO1
Transcriptional regulation of white adipocyte differentiation	EIF4A2
Transferrin endocytosis and recycling	ATP6V1A;ATP6V1B2;ATP6V1H;ATP6V1E1;ATP6V0D1;ATP6V1D;ATP6V1C1;ATP6V1F;ATP6V1B1
trans-Golgi Network Vesicle Budding	ARF1;AP1G1;CLTC;AP3B1;ARRB1;AP3S1;AP1M1
Translation	EIF4A2;DDOST;TUFM
Translation initiation complex formation	EIF4A2
Translocation of SLC2A4 (GLUT4) to the plasma membrane	RAB14
Transmission across Chemical Synapses	ATIC
Transport of Mature mRNA derived from an Intron-Containing Transcript	FLOT2
Transport of Mature mRNA Derived from an Intronless Transcript	FLOT2
Transport of Mature mRNAs Derived from Intronless Transcripts	FLOT2
Transport of Mature Transcript to Cytoplasm	FLOT2
Transport of Ribonucleoproteins into the Host Nucleus	FLOT2
Transport of small molecules	ATP6V1A;CLTC;SLC2A1;SLC2A3;FXYD1;ATP6V1B2;STOM;ATP6V1H;LRRC8A;ATP6V1E1;ATP6V0D1;ATP6V1D;ATP6V1C1;ATP6V1F;ATP6V1B1
Transport of the SLBP Dependant Mature mRNA	FLOT2
Transport of the SLBP independent Mature mRNA	FLOT2
Transport to the Golgi and subsequent modification	ARF1;AP3D1
TRIF(TICAM1)-mediated TLR4 signaling	ATP6V1D
tRNA processing	FLOT2
tRNA processing in the nucleus	FLOT2
truncated APC mutants destabilize the destruction complex	CSNK1A1
Truncations of AMER1 destabilize the destruction complex	CSNK1A1
Ub-specific processing proteases	ARRB1;ARRB2
Unfolded Protein Response (UPR)	ATP6V0D1
VEGFA-VEGFR2 Pathway	FYN
Vesicle-mediated transport	ARF1;RAB14;AP1G1;CUL2;CLTC;AP3D1;AP3B1;ARRB1;ARRB2;AP3S1;ARF6;AP1M1
Viral Messenger RNA Synthesis	FLOT2
Vitamin C (ascorbate) metabolism	SLC2A1;SLC2A3
VLDLR internalisation and degradation	CLTC
Vpr-mediated nuclear import of PICs	FLOT2
WNT5A-dependent internalization of FZD2, FZD5 and ROR2	CLTC
WNT5A-dependent internalization of FZD4	CLTC;ARRB2
XBP1(S) activates chaperone genes	ATP6V0D1
